# Supplementary material
Source: ML conference proceedings conference paper supplement (https://openaccess.thecvf.com/content/ICCV2023/html/Lee_Semantic-Aware_Dynamic_Parameter_ICCV_2023_paper.html)
Supplement: Supplementary file 1 [file Lee_Semantic-Aware_Dynamic_Parameter_ICCV_2023_supplemental.zip]

Archive with 4 entries (4 files):
- 08902-supp.pdf
- __MACOSX/._08902-supp.pdf
- supp.mp4
- __MACOSX/._supp.mp4
